# Supplementary material
Source: PubMed Central journal article supplement (PMC4557970)

# Supplementary Figure 1S

HN30 Cells

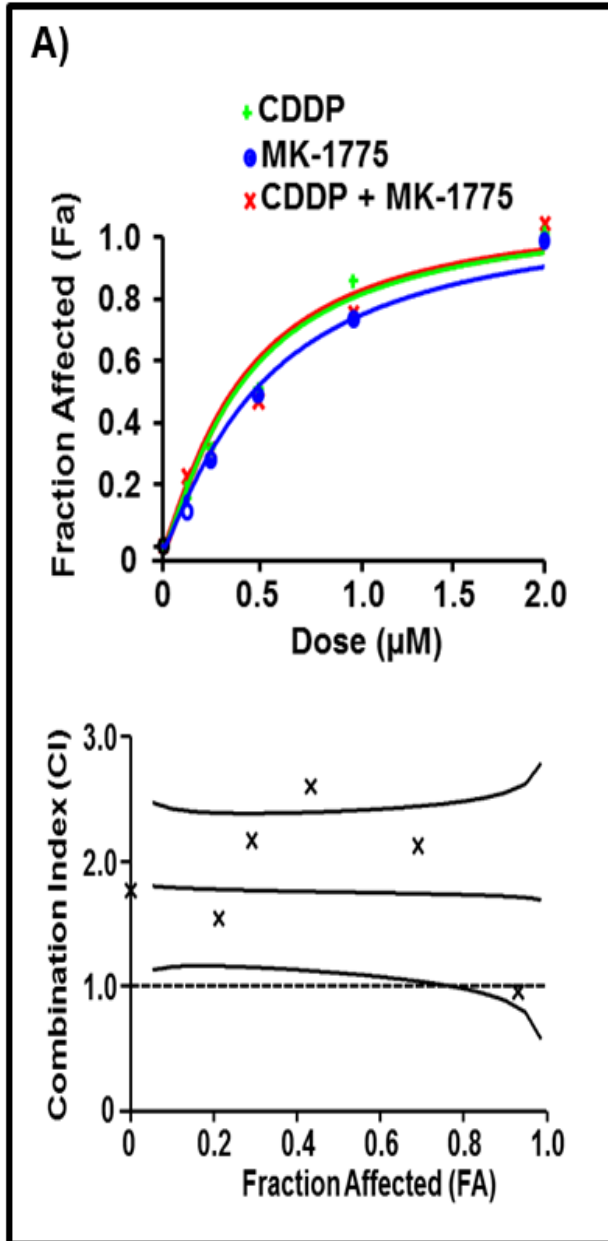

HN31 Cells

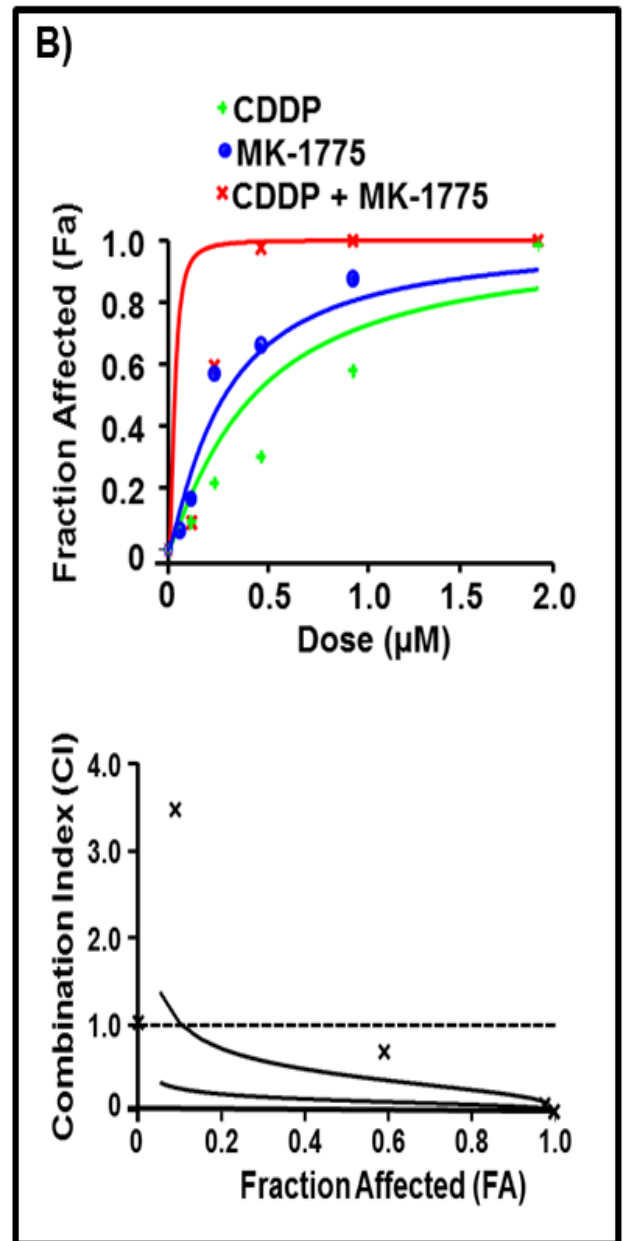

Supplement: NIHMS692472-supplement-Fig_S1.pdf [file NIHMS692472-supplement-Fig_S1.pdf]

# Supplementary Figure S3

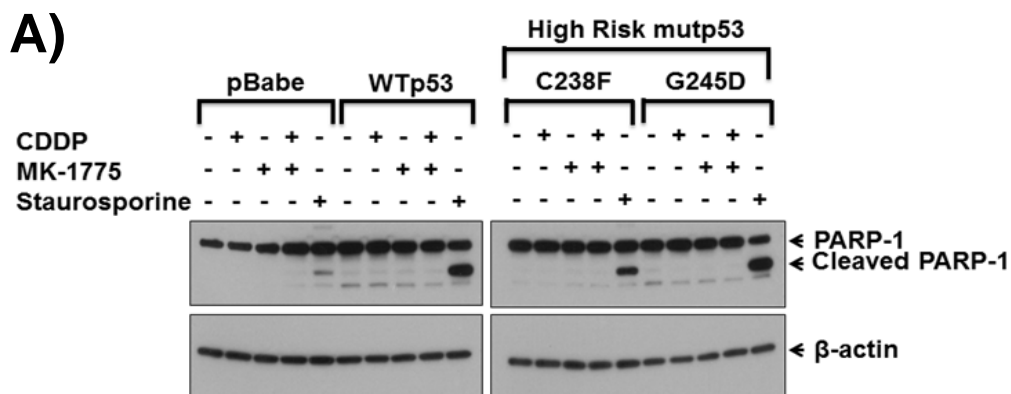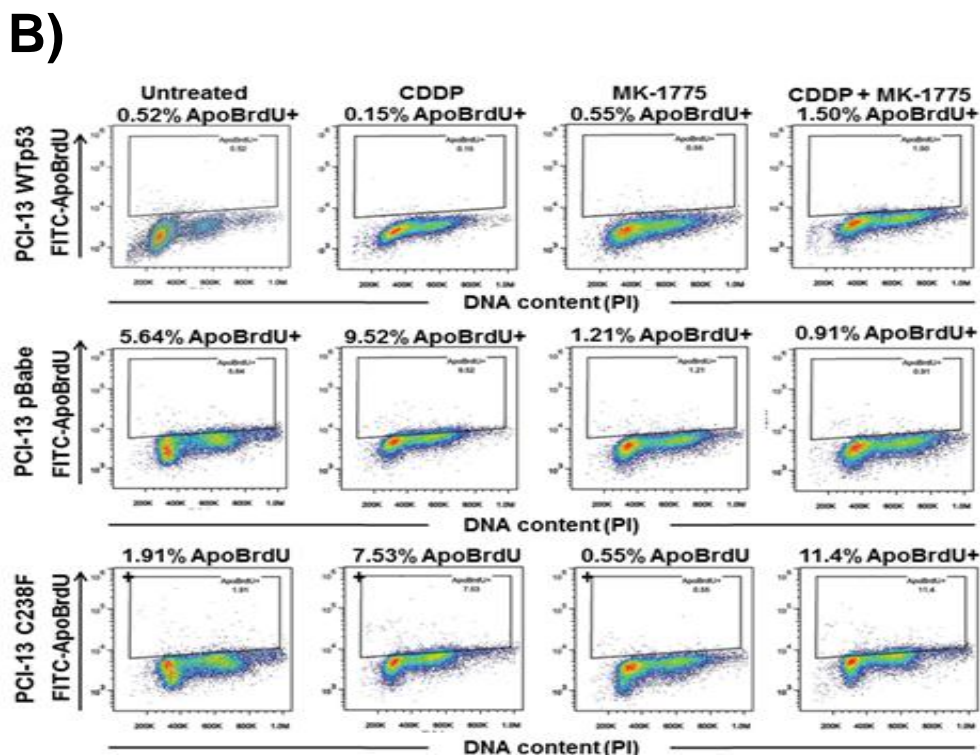

Supplement: NIHMS692472-supplement-Fig_S3.pdf [file NIHMS692472-supplement-Fig_S3.pdf]
